# Supplementary material for: Genome-scale pan-cancer interrogation of lncRNA dependencies using CasRx
Source: PubMed Central journal article supplement (PMC11009108; doi:10.1038/s41592-024-02190-0), 2024-02-26
Supplement: 41592_2024_2190_MOESM5_ESM.pdf [file 41592_2024_2190_MOESM5_ESM.pdf]

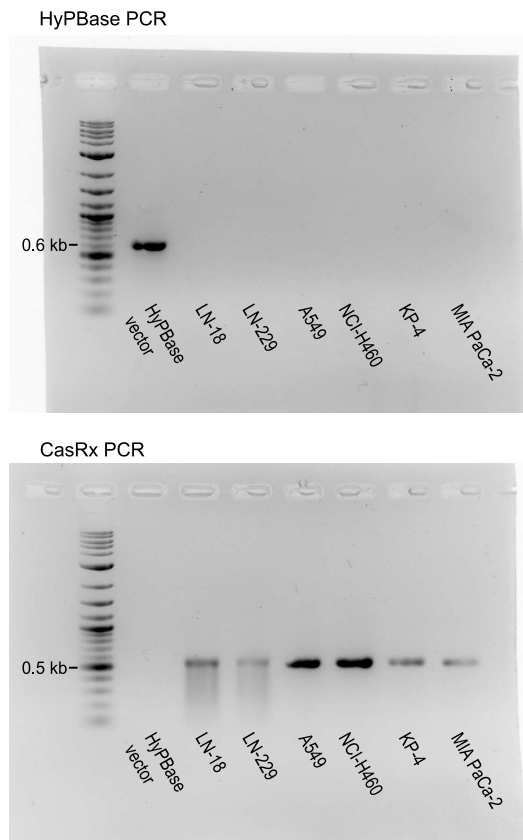

**Source data Fig. 1: Full blot from the Supplementary Figure 1b.**

Agarose gel electrophoresis displaying the PCR amplification of the HypBase-transposase or the CasRx-transposon locus using either the HypBase-transposase vector or DNA extracted from the CasRx clones as template.
